# Supplementary material
Source: publisher figshare collection journal article supplement (https://rs.figshare.com/ndownloader/files/17842580)
Supplement: Supplementary file 1 [file 17842580]

10	0.3	0.01	1	-1	0.03	0.04	0.4	0	10	1	47.949	0.08453
10	0.5	0.01	1	-1	0.03	0.04	0.4	0.1	10	1	47.259	0.09558
10	0.7	0.7	1	-1	0.03	0.04	0.4	0.2	10	1	88.978	0.10348
10	0.8	0.99	1	-1	0.03	0.04	0.4	0.3	10	1	190.81	0.09636
10	0.9	0.99	1	-1	0.03	0.04	0.4	0.4	10	1	372.08	0.08896
10	0.9	0.99	1	-1	0.03	0.04	0.4	0.5	10	1	360.65	0.08249
10	0.9	0.99	1	-1	0.03	0.04	0.4	0.6	10	1	350.06	0.07668
10	0.9	0.99	1	-1	0.03	0.04	0.4	0.7	10	1	338.76	0.07146
10	0.99	0.99	1	-1	0.03	0.04	0.4	0.8	10	1	2108.6	0.08314
10	0.99	0.99	1	-1	0.03	0.04	0.4	0.9	10	1	2133.1	0.0826
